# Supplementary material for: Disease burden and related risk factors of esophageal cancer in China and globally from 1990 to 2021, with forecast to 2035: An analysis and comparison
Source: PubMed Central journal article supplement (PMC11292605; doi:10.18332/tid/191389), 2024-08-01
Supplement: TID-22-140-s1.pdf [file TID-22-140-s1.pdf]

| measure | location | sex  | age              | cause             | metric | year | val   | upper | lower |
|---------|----------|------|------------------|-------------------|--------|------|-------|-------|-------|
| Deaths  | Global   | Both | Age-standardized | Esophageal cancer | Rate   | 1992 | 8,91  | 9,73  | 8,07  |
| Deaths  | Global   | Both | Age-standardized | Esophageal cancer | Rate   | 1997 | 8,54  | 9,13  | 7,75  |
| Deaths  | Global   | Both | Age-standardized | Esophageal cancer | Rate   | 1994 | 8,81  | 9,50  | 7,97  |
| Deaths  | Global   | Both | Age-standardized | Esophageal cancer | Rate   | 1990 | 9,02  | 9,87  | 8,11  |
| Deaths  | China    | Both | Age-standardized | Esophageal cancer | Rate   | 1990 | 26,06 | 30,10 | 21,77 |
| Deaths  | China    | Both | Age-standardized | Esophageal cancer | Rate   | 1992 | 25,30 | 29,07 | 21,36 |
| Deaths  | China    | Both | Age-standardized | Esophageal cancer | Rate   | 1994 | 24,58 | 27,63 | 20,82 |
| Deaths  | China    | Both | Age-standardized | Esophageal cancer | Rate   | 1997 | 23,45 | 26,12 | 19,99 |
| Deaths  | Global   | Both | Age-standardized | Esophageal cancer | Rate   | 1998 | 8,50  | 9,06  | 7,57  |
| Deaths  | Global   | Both | Age-standardized | Esophageal cancer | Rate   | 1995 | 8,76  | 9,37  | 7,82  |
| Deaths  | China    | Both | Age-standardized | Esophageal cancer | Rate   | 1999 | 23,25 | 25,88 | 19,48 |
| Deaths  | China    | Both | Age-standardized | Esophageal cancer | Rate   | 1998 | 23,27 | 25,88 | 19,38 |
| Deaths  | Global   | Both | Age-standardized | Esophageal cancer | Rate   | 1991 | 8,96  | 9,77  | 8,09  |
| Deaths  | China    | Both | Age-standardized | Esophageal cancer | Rate   | 1991 | 25,70 | 29,46 | 21,65 |
| Deaths  | China    | Both | Age-standardized | Esophageal cancer | Rate   | 1995 | 24,38 | 27,15 | 20,32 |
| Deaths  | Global   | Both | Age-standardized | Esophageal cancer | Rate   | 2003 | 8,50  | 9,06  | 7,64  |
| Deaths  | China    | Both | Age-standardized | Esophageal cancer | Rate   | 2005 | 22,92 | 25,45 | 19,42 |
| Deaths  | China    | Both | Age-standardized | Esophageal cancer | Rate   | 2003 | 23,67 | 26,17 | 19,84 |
| Deaths  | Global   | Both | Age-standardized | Esophageal cancer | Rate   | 2000 | 8,55  | 9,21  | 7,69  |
| Deaths  | Global   | Both | Age-standardized | Esophageal cancer | Rate   | 2001 | 8,54  | 9,18  | 7,66  |
| Deaths  | China    | Both | Age-standardized | Esophageal cancer | Rate   | 2000 | 23,66 | 26,53 | 20,05 |
| Deaths  | China    | Both | Age-standardized | Esophageal cancer | Rate   | 2004 | 23,76 | 26,41 | 20,05 |
| Deaths  | Global   | Both | Age-standardized | Esophageal cancer | Rate   | 2006 | 7,87  | 8,41  | 7,11  |
| Deaths  | China    | Both | Age-standardized | Esophageal cancer | Rate   | 2006 | 21,09 | 23,47 | 17,91 |
| Deaths  | Global   | Both | Age-standardized | Esophageal cancer | Rate   | 1999 | 8,48  | 9,09  | 7,61  |
| Deaths  | China    | Both | Age-standardized | Esophageal cancer | Rate   | 2001 | 23,73 | 26,71 | 20,07 |
| Deaths  | Global   | Both | Age-standardized | Esophageal cancer | Rate   | 2004 | 8,48  | 9,09  | 7,61  |
| Deaths  | Global   | Both | Age-standardized | Esophageal cancer | Rate   | 2008 | 7,45  | 7,94  | 6,86  |
| Deaths  | Global   | Both | Age-standardized | Esophageal cancer | Rate   | 2005 | 8,28  | 8,83  | 7,49  |
| Deaths  | China    | Both | Age-standardized | Esophageal cancer | Rate   | 2010 | 18,15 | 20,37 | 15,56 |

|        |        |      |                  |                   |      |      |       |       |       |
|--------|--------|------|------------------|-------------------|------|------|-------|-------|-------|
| Deaths | China  | Both | Age-standardized | Esophageal cancer | Rate | 2008 | 19,28 | 21,39 | 16,87 |
| Deaths | Global | Both | Age-standardized | Esophageal cancer | Rate | 2007 | 7,62  | 8,15  | 6,88  |
| Deaths | China  | Both | Age-standardized | Esophageal cancer | Rate | 2007 | 19,95 | 22,26 | 16,95 |
| Deaths | Global | Both | Age-standardized | Esophageal cancer | Rate | 2011 | 7,00  | 7,51  | 6,46  |
| Deaths | China  | Both | Age-standardized | Esophageal cancer | Rate | 2011 | 17,44 | 19,45 | 15,28 |
| Deaths | China  | Both | Age-standardized | Esophageal cancer | Rate | 2009 | 18,74 | 20,74 | 16,22 |
| Deaths | Global | Both | Age-standardized | Esophageal cancer | Rate | 2013 | 6,63  | 7,15  | 6,11  |
| Deaths | Global | Both | Age-standardized | Esophageal cancer | Rate | 2009 | 7,31  | 7,78  | 6,69  |
| Deaths | China  | Both | Age-standardized | Esophageal cancer | Rate | 2013 | 15,98 | 17,87 | 14,04 |
| Deaths | Global | Both | Age-standardized | Esophageal cancer | Rate | 2015 | 6,40  | 6,94  | 5,87  |
| Deaths | Global | Both | Age-standardized | Esophageal cancer | Rate | 2012 | 6,81  | 7,37  | 6,26  |
| Deaths | Global | Both | Age-standardized | Esophageal cancer | Rate | 2010 | 7,18  | 7,69  | 6,55  |
| Deaths | China  | Both | Age-standardized | Esophageal cancer | Rate | 2015 | 14,79 | 16,92 | 12,75 |
| Deaths | China  | Both | Age-standardized | Esophageal cancer | Rate | 2012 | 16,72 | 18,96 | 14,61 |
| Deaths | Global | Both | Age-standardized | Esophageal cancer | Rate | 2014 | 6,47  | 7,03  | 5,91  |
| Deaths | China  | Both | Age-standardized | Esophageal cancer | Rate | 2017 | 14,27 | 17,04 | 11,97 |
| Deaths | Global | Both | Age-standardized | Esophageal cancer | Rate | 2018 | 6,27  | 6,98  | 5,62  |
| Deaths | Global | Both | Age-standardized | Esophageal cancer | Rate | 2016 | 6,36  | 6,96  | 5,75  |
| Deaths | China  | Both | Age-standardized | Esophageal cancer | Rate | 2016 | 14,57 | 16,90 | 12,33 |
| Deaths | China  | Both | Age-standardized | Esophageal cancer | Rate | 2014 | 15,22 | 17,41 | 13,18 |
| Deaths | Global | Both | Age-standardized | Esophageal cancer | Rate | 2019 | 6,28  | 7,01  | 5,60  |
| Deaths | China  | Both | Age-standardized | Esophageal cancer | Rate | 2018 | 14,19 | 16,92 | 11,58 |
| Deaths | Global | Both | Age-standardized | Esophageal cancer | Rate | 2017 | 6,28  | 6,98  | 5,68  |
| Deaths | Global | Both | Age-standardized | Esophageal cancer | Rate | 1993 | 8,87  | 9,62  | 7,99  |
| Deaths | Global | Both | Age-standardized | Esophageal cancer | Rate | 1996 | 8,65  | 9,25  | 7,76  |
| Deaths | China  | Both | Age-standardized | Esophageal cancer | Rate | 2019 | 14,18 | 16,96 | 11,68 |
| Deaths | Global | Both | Age-standardized | Esophageal cancer | Rate | 2021 | 6,25  | 7,00  | 5,53  |
| Deaths | Global | Both | Age-standardized | Esophageal cancer | Rate | 2002 | 8,48  | 9,09  | 7,58  |
| Deaths | China  | Both | Age-standardized | Esophageal cancer | Rate | 2021 | 14,13 | 17,18 | 11,36 |
| Deaths | Global | Both | Age-standardized | Esophageal cancer | Rate | 2020 | 6,26  | 6,99  | 5,54  |
| Deaths | China  | Both | Age-standardized | Esophageal cancer | Rate | 1993 | 24,94 | 28,35 | 21,03 |

|                                        |        |      |                  |                   |      |      |        |        |        |
|----------------------------------------|--------|------|------------------|-------------------|------|------|--------|--------|--------|
| Deaths                                 | China  | Both | Age-standardized | Esophageal cancer | Rate | 1996 | 23,85  | 26,66  | 20,05  |
| Deaths                                 | China  | Both | Age-standardized | Esophageal cancer | Rate | 2002 | 23,52  | 26,14  | 19,77  |
| Deaths                                 | China  | Both | Age-standardized | Esophageal cancer | Rate | 2020 | 14,20  | 16,98  | 11,47  |
| DALYs (Disability-Adjusted Life Years) | Global | Both | Age-standardized | Esophageal cancer | Rate | 1990 | 235,32 | 258,68 | 210,52 |
| DALYs (Disability-Adjusted Life Years) | China  | Both | Age-standardized | Esophageal cancer | Rate | 1991 | 643,40 | 741,57 | 543,36 |
| DALYs (Disability-Adjusted Life Years) | China  | Both | Age-standardized | Esophageal cancer | Rate | 1990 | 653,31 | 758,88 | 543,18 |
| DALYs (Disability-Adjusted Life Years) | Global | Both | Age-standardized | Esophageal cancer | Rate | 1994 | 227,87 | 246,56 | 207,74 |
| DALYs (Disability-Adjusted Life Years) | China  | Both | Age-standardized | Esophageal cancer | Rate | 1996 | 587,46 | 657,60 | 497,26 |
| DALYs (Disability-Adjusted Life Years) | China  | Both | Age-standardized | Esophageal cancer | Rate | 1995 | 602,43 | 678,34 | 506,39 |
| DALYs (Disability-Adjusted Life Years) | Global | Both | Age-standardized | Esophageal cancer | Rate | 1995 | 225,92 | 242,29 | 202,79 |
| DALYs (Disability-Adjusted Life Years) | China  | Both | Age-standardized | Esophageal cancer | Rate | 1993 | 620,90 | 712,28 | 530,45 |
| DALYs (Disability-Adjusted Life Years) | Global | Both | Age-standardized | Esophageal cancer | Rate | 1993 | 230,10 | 250,33 | 207,81 |
| DALYs (Disability-Adjusted Life Years) | China  | Both | Age-standardized | Esophageal cancer | Rate | 1994 | 609,29 | 690,61 | 518,10 |
| DALYs (Disability-Adjusted Life Years) | China  | Both | Age-standardized | Esophageal cancer | Rate | 1992 | 631,83 | 731,62 | 529,96 |
| DALYs (Disability-Adjusted Life Years) | China  | Both | Age-standardized | Esophageal cancer | Rate | 1997 | 574,86 | 642,74 | 494,32 |
| DALYs (Disability-Adjusted Life Years) | China  | Both | Age-standardized | Esophageal cancer | Rate | 1998 | 568,10 | 633,71 | 480,80 |
| DALYs (Disability-Adjusted Life Years) | China  | Both | Age-standardized | Esophageal cancer | Rate | 2002 | 559,74 | 623,48 | 476,31 |
| DALYs (Disability-Adjusted Life Years) | Global | Both | Age-standardized | Esophageal cancer | Rate | 1991 | 233,54 | 255,39 | 210,73 |
| DALYs (Disability-Adjusted Life Years) | Global | Both | Age-standardized | Esophageal cancer | Rate | 1992 | 231,64 | 254,20 | 208,94 |
| DALYs (Disability-Adjusted Life Years) | China  | Both | Age-standardized | Esophageal cancer | Rate | 2001 | 567,50 | 640,84 | 484,34 |
| DALYs (Disability-Adjusted Life Years) | China  | Both | Age-standardized | Esophageal cancer | Rate | 2003 | 557,10 | 619,89 | 473,95 |
| DALYs (Disability-Adjusted Life Years) | China  | Both | Age-standardized | Esophageal cancer | Rate | 2000 | 570,60 | 639,60 | 489,10 |
| DALYs (Disability-Adjusted Life Years) | China  | Both | Age-standardized | Esophageal cancer | Rate | 2004 | 555,75 | 619,29 | 478,40 |
| DALYs (Disability-Adjusted Life Years) | China  | Both | Age-standardized | Esophageal cancer | Rate | 1999 | 565,11 | 629,75 | 479,01 |
| DALYs (Disability-Adjusted Life Years) | Global | Both | Age-standardized | Esophageal cancer | Rate | 1996 | 222,40 | 238,00 | 200,61 |
| DALYs (Disability-Adjusted Life Years) | Global | Both | Age-standardized | Esophageal cancer | Rate | 1999 | 216,14 | 230,75 | 193,73 |
| DALYs (Disability-Adjusted Life Years) | Global | Both | Age-standardized | Esophageal cancer | Rate | 2001 | 215,61 | 232,26 | 195,16 |
| DALYs (Disability-Adjusted Life Years) | China  | Both | Age-standardized | Esophageal cancer | Rate | 2009 | 428,18 | 473,39 | 376,91 |
| DALYs (Disability-Adjusted Life Years) | China  | Both | Age-standardized | Esophageal cancer | Rate | 2010 | 411,94 | 464,67 | 356,37 |
| DALYs (Disability-Adjusted Life Years) | Global | Both | Age-standardized | Esophageal cancer | Rate | 1998 | 217,20 | 232,00 | 195,02 |
| DALYs (Disability-Adjusted Life Years) | China  | Both | Age-standardized | Esophageal cancer | Rate | 2007 | 464,22 | 515,24 | 403,50 |

|                                        |        |      |                  |                   |      |      |        |        |        |
|----------------------------------------|--------|------|------------------|-------------------|------|------|--------|--------|--------|
| DALYs (Disability-Adjusted Life Years) | Global | Both | Age-standardized | Esophageal cancer | Rate | 2000 | 216,89 | 233,37 | 196,26 |
| DALYs (Disability-Adjusted Life Years) | China  | Both | Age-standardized | Esophageal cancer | Rate | 2008 | 445,10 | 494,75 | 395,60 |
| DALYs (Disability-Adjusted Life Years) | China  | Both | Age-standardized | Esophageal cancer | Rate | 2005 | 533,01 | 589,74 | 461,18 |
| DALYs (Disability-Adjusted Life Years) | Global | Both | Age-standardized | Esophageal cancer | Rate | 1997 | 219,01 | 234,82 | 199,06 |
| DALYs (Disability-Adjusted Life Years) | China  | Both | Age-standardized | Esophageal cancer | Rate | 2006 | 492,21 | 545,83 | 424,63 |
| DALYs (Disability-Adjusted Life Years) | China  | Both | Age-standardized | Esophageal cancer | Rate | 2014 | 343,29 | 395,03 | 294,41 |
| DALYs (Disability-Adjusted Life Years) | China  | Both | Age-standardized | Esophageal cancer | Rate | 2013 | 361,35 | 409,49 | 317,44 |
| DALYs (Disability-Adjusted Life Years) | China  | Both | Age-standardized | Esophageal cancer | Rate | 2017 | 320,13 | 384,06 | 267,22 |
| DALYs (Disability-Adjusted Life Years) | China  | Both | Age-standardized | Esophageal cancer | Rate | 2012 | 379,43 | 431,53 | 333,75 |
| DALYs (Disability-Adjusted Life Years) | China  | Both | Age-standardized | Esophageal cancer | Rate | 2016 | 326,76 | 382,43 | 276,12 |
| DALYs (Disability-Adjusted Life Years) | China  | Both | Age-standardized | Esophageal cancer | Rate | 2015 | 332,92 | 383,88 | 282,08 |
| DALYs (Disability-Adjusted Life Years) | China  | Both | Age-standardized | Esophageal cancer | Rate | 2011 | 395,13 | 443,88 | 349,36 |
| DALYs (Disability-Adjusted Life Years) | Global | Both | Age-standardized | Esophageal cancer | Rate | 2004 | 211,14 | 226,75 | 191,39 |
| DALYs (Disability-Adjusted Life Years) | Global | Both | Age-standardized | Esophageal cancer | Rate | 2002 | 213,38 | 228,48 | 191,67 |
| DALYs (Disability-Adjusted Life Years) | Global | Both | Age-standardized | Esophageal cancer | Rate | 2007 | 188,98 | 201,81 | 171,50 |
| DALYs (Disability-Adjusted Life Years) | Global | Both | Age-standardized | Esophageal cancer | Rate | 2005 | 205,65 | 219,40 | 187,73 |
| DALYs (Disability-Adjusted Life Years) | China  | Both | Age-standardized | Esophageal cancer | Rate | 2019 | 318,04 | 387,10 | 254,49 |
| DALYs (Disability-Adjusted Life Years) | Global | Both | Age-standardized | Esophageal cancer | Rate | 2003 | 212,35 | 226,59 | 191,40 |
| DALYs (Disability-Adjusted Life Years) | China  | Both | Age-standardized | Esophageal cancer | Rate | 2020 | 318,34 | 385,88 | 253,87 |
| DALYs (Disability-Adjusted Life Years) | China  | Both | Age-standardized | Esophageal cancer | Rate | 2021 | 317,18 | 392,42 | 252,46 |
| DALYs (Disability-Adjusted Life Years) | Global | Both | Age-standardized | Esophageal cancer | Rate | 2006 | 195,82 | 208,78 | 179,76 |
| DALYs (Disability-Adjusted Life Years) | China  | Both | Age-standardized | Esophageal cancer | Rate | 2018 | 318,50 | 381,69 | 257,85 |
| DALYs (Disability-Adjusted Life Years) | Global | Both | Age-standardized | Esophageal cancer | Rate | 2012 | 165,44 | 179,22 | 153,87 |
| DALYs (Disability-Adjusted Life Years) | Global | Both | Age-standardized | Esophageal cancer | Rate | 2013 | 160,52 | 174,29 | 148,21 |
| DALYs (Disability-Adjusted Life Years) | Global | Both | Age-standardized | Esophageal cancer | Rate | 2011 | 170,06 | 182,62 | 158,17 |
| DALYs (Disability-Adjusted Life Years) | Global | Both | Age-standardized | Esophageal cancer | Rate | 2009 | 178,91 | 190,44 | 164,91 |
| DALYs (Disability-Adjusted Life Years) | Global | Both | Age-standardized | Esophageal cancer | Rate | 2010 | 174,78 | 187,47 | 160,74 |
| DALYs (Disability-Adjusted Life Years) | Global | Both | Age-standardized | Esophageal cancer | Rate | 2008 | 183,78 | 195,72 | 170,42 |
| DALYs (Disability-Adjusted Life Years) | Global | Both | Age-standardized | Esophageal cancer | Rate | 2014 | 156,11 | 169,46 | 143,10 |
| DALYs (Disability-Adjusted Life Years) | Global | Both | Age-standardized | Esophageal cancer | Rate | 2015 | 153,87 | 166,87 | 140,76 |
| DALYs (Disability-Adjusted Life Years) | Global | Both | Age-standardized | Esophageal cancer | Rate | 2016 | 152,44 | 166,92 | 138,30 |

|                                        |        |      |                  |                   |        |      |        |        |        |
|----------------------------------------|--------|------|------------------|-------------------|--------|------|--------|--------|--------|
| DALYs (Disability-Adjusted Life Years) | Global | Both | Age-standardized | Esophageal cancer | Rate   | 2019 | 149,63 | 166,93 | 133,20 |
| DALYs (Disability-Adjusted Life Years) | Global | Both | Age-standardized | Esophageal cancer | Rate   | 2017 | 150,27 | 167,71 | 136,34 |
| DALYs (Disability-Adjusted Life Years) | Global | Both | Age-standardized | Esophageal cancer | Rate   | 2018 | 149,80 | 166,55 | 133,99 |
| DALYs (Disability-Adjusted Life Years) | Global | Both | Age-standardized | Esophageal cancer | Rate   | 2021 | 148,56 | 166,82 | 131,71 |
| DALYs (Disability-Adjusted Life Years) | Global | Both | Age-standardized | Esophageal cancer | Rate   | 2020 | 148,87 | 167,34 | 132,19 |
| Deaths                                 | Global | Both | All ages         | Esophageal cancer | Number | 1992 | 367854 | 402697 | 332830 |
| Deaths                                 | Global | Both | All ages         | Esophageal cancer | Number | 1997 | 391929 | 419544 | 355991 |
| Deaths                                 | Global | Both | All ages         | Esophageal cancer | Number | 1994 | 379482 | 409554 | 344458 |
| Deaths                                 | Global | Both | All ages         | Esophageal cancer | Number | 1990 | 356263 | 390154 | 319363 |
| Deaths                                 | China  | Both | All ages         | Esophageal cancer | Number | 1990 | 210821 | 244587 | 176081 |
| Deaths                                 | China  | Both | All ages         | Esophageal cancer | Number | 1992 | 216089 | 250526 | 181479 |
| Deaths                                 | China  | Both | All ages         | Esophageal cancer | Number | 1994 | 220549 | 249108 | 187036 |
| Deaths                                 | China  | Both | All ages         | Esophageal cancer | Number | 1997 | 226558 | 253136 | 193991 |
| Deaths                                 | Global | Both | All ages         | Esophageal cancer | Number | 1998 | 398784 | 424728 | 355525 |
| Deaths                                 | Global | Both | All ages         | Esophageal cancer | Number | 1995 | 385123 | 412402 | 343147 |
| Deaths                                 | China  | Both | All ages         | Esophageal cancer | Number | 1999 | 236386 | 263482 | 199594 |
| Deaths                                 | China  | Both | All ages         | Esophageal cancer | Number | 1998 | 230449 | 256628 | 193358 |
| Deaths                                 | Global | Both | All ages         | Esophageal cancer | Number | 1991 | 362080 | 395135 | 325950 |
| Deaths                                 | China  | Both | All ages         | Esophageal cancer | Number | 1991 | 213826 | 246310 | 180581 |
| Deaths                                 | China  | Both | All ages         | Esophageal cancer | Number | 1995 | 224144 | 251784 | 187216 |
| Deaths                                 | Global | Both | All ages         | Esophageal cancer | Number | 2003 | 447142 | 476139 | 401775 |
| Deaths                                 | China  | Both | All ages         | Esophageal cancer | Number | 2005 | 271912 | 301455 | 234015 |
| Deaths                                 | China  | Both | All ages         | Esophageal cancer | Number | 2003 | 265515 | 295403 | 224543 |
| Deaths                                 | Global | Both | All ages         | Esophageal cancer | Number | 2000 | 419305 | 451944 | 377789 |
| Deaths                                 | Global | Both | All ages         | Esophageal cancer | Number | 2001 | 428697 | 461453 | 385859 |
| Deaths                                 | China  | Both | All ages         | Esophageal cancer | Number | 2000 | 246171 | 276556 | 209511 |
| Deaths                                 | China  | Both | All ages         | Esophageal cancer | Number | 2004 | 274244 | 305673 | 234203 |
| Deaths                                 | Global | Both | All ages         | Esophageal cancer | Number | 2006 | 447654 | 478727 | 405381 |
| Deaths                                 | China  | Both | All ages         | Esophageal cancer | Number | 2006 | 259698 | 288001 | 222440 |
| Deaths                                 | Global | Both | All ages         | Esophageal cancer | Number | 1999 | 406979 | 435928 | 364356 |
| Deaths                                 | China  | Both | All ages         | Esophageal cancer | Number | 2001 | 252972 | 284784 | 214759 |

|        |        |      |          |                   |        |      |        |        |        |
|--------|--------|------|----------|-------------------|--------|------|--------|--------|--------|
| Deaths | Global | Both | All ages | Esophageal cancer | Number | 2004 | 457473 | 490359 | 412003 |
| Deaths | Global | Both | All ages | Esophageal cancer | Number | 2008 | 447050 | 476379 | 412161 |
| Deaths | Global | Both | All ages | Esophageal cancer | Number | 2005 | 458085 | 489196 | 414887 |
| Deaths | China  | Both | All ages | Esophageal cancer | Number | 2010 | 254853 | 286887 | 219084 |
| Deaths | China  | Both | All ages | Esophageal cancer | Number | 2008 | 253433 | 281622 | 224265 |
| Deaths | Global | Both | All ages | Esophageal cancer | Number | 2007 | 445063 | 475896 | 401655 |
| Deaths | China  | Both | All ages | Esophageal cancer | Number | 2007 | 254231 | 282263 | 219017 |
| Deaths | Global | Both | All ages | Esophageal cancer | Number | 2011 | 455915 | 489344 | 421914 |
| Deaths | China  | Both | All ages | Esophageal cancer | Number | 2011 | 254279 | 285371 | 223581 |
| Deaths | China  | Both | All ages | Esophageal cancer | Number | 2009 | 254500 | 282037 | 223093 |
| Deaths | Global | Both | All ages | Esophageal cancer | Number | 2013 | 457698 | 493594 | 421943 |
| Deaths | Global | Both | All ages | Esophageal cancer | Number | 2009 | 450325 | 480337 | 412913 |
| Deaths | China  | Both | All ages | Esophageal cancer | Number | 2013 | 251325 | 282430 | 220439 |
| Deaths | Global | Both | All ages | Esophageal cancer | Number | 2015 | 467148 | 506901 | 428427 |
| Deaths | Global | Both | All ages | Esophageal cancer | Number | 2012 | 456959 | 494630 | 420835 |
| Deaths | Global | Both | All ages | Esophageal cancer | Number | 2010 | 454406 | 486899 | 414664 |
| Deaths | China  | Both | All ages | Esophageal cancer | Number | 2015 | 250230 | 287883 | 214162 |
| Deaths | China  | Both | All ages | Esophageal cancer | Number | 2012 | 253691 | 288068 | 222976 |
| Deaths | Global | Both | All ages | Esophageal cancer | Number | 2014 | 459463 | 499145 | 420001 |
| Deaths | China  | Both | All ages | Esophageal cancer | Number | 2017 | 259691 | 310559 | 217233 |
| Deaths | Global | Both | All ages | Esophageal cancer | Number | 2018 | 498914 | 555770 | 447209 |
| Deaths | Global | Both | All ages | Esophageal cancer | Number | 2016 | 477679 | 522921 | 432278 |
| Deaths | China  | Both | All ages | Esophageal cancer | Number | 2016 | 255534 | 297788 | 216152 |
| Deaths | China  | Both | All ages | Esophageal cancer | Number | 2014 | 248362 | 284749 | 214253 |
| Deaths | Global | Both | All ages | Esophageal cancer | Number | 2019 | 514058 | 575458 | 457445 |
| Deaths | China  | Both | All ages | Esophageal cancer | Number | 2018 | 267707 | 320221 | 217433 |
| Deaths | Global | Both | All ages | Esophageal cancer | Number | 2017 | 485412 | 539606 | 439356 |
| Deaths | Global | Both | All ages | Esophageal cancer | Number | 1993 | 374159 | 406279 | 336992 |
| Deaths | Global | Both | All ages | Esophageal cancer | Number | 1996 | 388183 | 416104 | 348668 |
| Deaths | China  | Both | All ages | Esophageal cancer | Number | 2019 | 277443 | 334599 | 225874 |
| Deaths | Global | Both | All ages | Esophageal cancer | Number | 2021 | 538602 | 603406 | 475944 |

|                                        |        |      |          |                   |        |      |          |          |          |
|----------------------------------------|--------|------|----------|-------------------|--------|------|----------|----------|----------|
| Deaths                                 | Global | Both | All ages | Esophageal cancer | Number | 2002 | 436058   | 467224   | 389499   |
| Deaths                                 | China  | Both | All ages | Esophageal cancer | Number | 2021 | 296443   | 362831   | 236648   |
| Deaths                                 | Global | Both | All ages | Esophageal cancer | Number | 2020 | 526254   | 588828   | 466272   |
| Deaths                                 | China  | Both | All ages | Esophageal cancer | Number | 1993 | 218368   | 249528   | 185875   |
| Deaths                                 | China  | Both | All ages | Esophageal cancer | Number | 1996 | 224882   | 252230   | 189990   |
| Deaths                                 | China  | Both | All ages | Esophageal cancer | Number | 2002 | 257688   | 288141   | 218177   |
| Deaths                                 | China  | Both | All ages | Esophageal cancer | Number | 2020 | 287520   | 345144   | 230847   |
| DALYs (Disability-Adjusted Life Years) | Global | Both | All ages | Esophageal cancer | Number | 1990 | 9753566  | 10739561 | 8719319  |
| DALYs (Disability-Adjusted Life Years) | China  | Both | All ages | Esophageal cancer | Number | 1991 | 5921058  | 6838260  | 5005209  |
| DALYs (Disability-Adjusted Life Years) | China  | Both | All ages | Esophageal cancer | Number | 1990 | 5852132  | 6818927  | 4841614  |
| DALYs (Disability-Adjusted Life Years) | Global | Both | All ages | Esophageal cancer | Number | 1994 | 10272653 | 11124557 | 9374630  |
| DALYs (Disability-Adjusted Life Years) | China  | Both | All ages | Esophageal cancer | Number | 1996 | 6097656  | 6824905  | 5166994  |
| DALYs (Disability-Adjusted Life Years) | China  | Both | All ages | Esophageal cancer | Number | 1995 | 6103767  | 6886628  | 5155727  |
| DALYs (Disability-Adjusted Life Years) | Global | Both | All ages | Esophageal cancer | Number | 1995 | 10387112 | 11154880 | 9327036  |
| DALYs (Disability-Adjusted Life Years) | China  | Both | All ages | Esophageal cancer | Number | 1993 | 6001175  | 6904144  | 5149451  |
| DALYs (Disability-Adjusted Life Years) | Global | Both | All ages | Esophageal cancer | Number | 1993 | 10165991 | 11079425 | 9180725  |
| DALYs (Disability-Adjusted Life Years) | China  | Both | All ages | Esophageal cancer | Number | 1994 | 6033051  | 6849128  | 5159261  |
| DALYs (Disability-Adjusted Life Years) | China  | Both | All ages | Esophageal cancer | Number | 1992 | 5963477  | 6901823  | 4982147  |
| DALYs (Disability-Adjusted Life Years) | China  | Both | All ages | Esophageal cancer | Number | 1997 | 6109489  | 6845649  | 5256416  |
| DALYs (Disability-Adjusted Life Years) | China  | Both | All ages | Esophageal cancer | Number | 1998 | 6177606  | 6892918  | 5242213  |
| DALYs (Disability-Adjusted Life Years) | China  | Both | All ages | Esophageal cancer | Number | 2002 | 6732801  | 7511867  | 5758461  |
| DALYs (Disability-Adjusted Life Years) | Global | Both | All ages | Esophageal cancer | Number | 1991 | 9892078  | 10821162 | 8918648  |
| DALYs (Disability-Adjusted Life Years) | Global | Both | All ages | Esophageal cancer | Number | 1992 | 10024767 | 11007515 | 9025707  |
| DALYs (Disability-Adjusted Life Years) | China  | Both | All ages | Esophageal cancer | Number | 2001 | 6643209  | 7517326  | 5690694  |
| DALYs (Disability-Adjusted Life Years) | China  | Both | All ages | Esophageal cancer | Number | 2003 | 6871596  | 7655929  | 5880604  |
| DALYs (Disability-Adjusted Life Years) | China  | Both | All ages | Esophageal cancer | Number | 2000 | 6514560  | 7305104  | 5603657  |
| DALYs (Disability-Adjusted Life Years) | China  | Both | All ages | Esophageal cancer | Number | 2004 | 7055984  | 7868778  | 6134066  |
| DALYs (Disability-Adjusted Life Years) | China  | Both | All ages | Esophageal cancer | Number | 1999 | 6305559  | 7014152  | 5340391  |
| DALYs (Disability-Adjusted Life Years) | Global | Both | All ages | Esophageal cancer | Number | 1996 | 10437031 | 11171100 | 9411901  |
| DALYs (Disability-Adjusted Life Years) | Global | Both | All ages | Esophageal cancer | Number | 1999 | 10819845 | 11571702 | 9696277  |
| DALYs (Disability-Adjusted Life Years) | Global | Both | All ages | Esophageal cancer | Number | 2001 | 11276797 | 12140859 | 10206712 |

|                                        |        |      |          |                   |        |      |          |          |          |
|----------------------------------------|--------|------|----------|-------------------|--------|------|----------|----------|----------|
| DALYs (Disability-Adjusted Life Years) | China  | Both | All ages | Esophageal cancer | Number | 2009 | 6350458  | 7020298  | 5559973  |
| DALYs (Disability-Adjusted Life Years) | China  | Both | All ages | Esophageal cancer | Number | 2010 | 6299565  | 7123617  | 5472702  |
| DALYs (Disability-Adjusted Life Years) | Global | Both | All ages | Esophageal cancer | Number | 1998 | 10636383 | 11357377 | 9575056  |
| DALYs (Disability-Adjusted Life Years) | China  | Both | All ages | Esophageal cancer | Number | 2007 | 6497175  | 7207738  | 5689209  |
| DALYs (Disability-Adjusted Life Years) | Global | Both | All ages | Esophageal cancer | Number | 2000 | 11092840 | 11942437 | 10040581 |
| DALYs (Disability-Adjusted Life Years) | China  | Both | All ages | Esophageal cancer | Number | 2008 | 6409388  | 7144229  | 5688002  |
| DALYs (Disability-Adjusted Life Years) | China  | Both | All ages | Esophageal cancer | Number | 2005 | 6963538  | 7721599  | 6078349  |
| DALYs (Disability-Adjusted Life Years) | Global | Both | All ages | Esophageal cancer | Number | 1997 | 10500306 | 11257458 | 9548951  |
| DALYs (Disability-Adjusted Life Years) | China  | Both | All ages | Esophageal cancer | Number | 2006 | 6665799  | 7406889  | 5789458  |
| DALYs (Disability-Adjusted Life Years) | China  | Both | All ages | Esophageal cancer | Number | 2014 | 6015922  | 6934641  | 5158136  |
| DALYs (Disability-Adjusted Life Years) | China  | Both | All ages | Esophageal cancer | Number | 2013 | 6127233  | 6979757  | 5360929  |
| DALYs (Disability-Adjusted Life Years) | China  | Both | All ages | Esophageal cancer | Number | 2017 | 6174075  | 7435775  | 5141197  |
| DALYs (Disability-Adjusted Life Years) | China  | Both | All ages | Esophageal cancer | Number | 2012 | 6224972  | 7094427  | 5472736  |
| DALYs (Disability-Adjusted Life Years) | China  | Both | All ages | Esophageal cancer | Number | 2016 | 6105703  | 7167879  | 5177025  |
| DALYs (Disability-Adjusted Life Years) | China  | Both | All ages | Esophageal cancer | Number | 2015 | 6023825  | 6950170  | 5087638  |
| DALYs (Disability-Adjusted Life Years) | China  | Both | All ages | Esophageal cancer | Number | 2011 | 6254531  | 7044457  | 5537622  |
| DALYs (Disability-Adjusted Life Years) | Global | Both | All ages | Esophageal cancer | Number | 2004 | 11857561 | 12742315 | 10752598 |
| DALYs (Disability-Adjusted Life Years) | Global | Both | All ages | Esophageal cancer | Number | 2002 | 11427308 | 12236592 | 10271501 |
| DALYs (Disability-Adjusted Life Years) | Global | Both | All ages | Esophageal cancer | Number | 2007 | 11467266 | 12241148 | 10432468 |
| DALYs (Disability-Adjusted Life Years) | Global | Both | All ages | Esophageal cancer | Number | 2005 | 11837684 | 12623647 | 10823228 |
| DALYs (Disability-Adjusted Life Years) | China  | Both | All ages | Esophageal cancer | Number | 2019 | 6525712  | 7985203  | 5192326  |
| DALYs (Disability-Adjusted Life Years) | Global | Both | All ages | Esophageal cancer | Number | 2003 | 11640595 | 12414635 | 10499616 |
| DALYs (Disability-Adjusted Life Years) | China  | Both | All ages | Esophageal cancer | Number | 2020 | 6725776  | 8200331  | 5331600  |
| DALYs (Disability-Adjusted Life Years) | China  | Both | All ages | Esophageal cancer | Number | 2021 | 6898666  | 8553366  | 5471181  |
| DALYs (Disability-Adjusted Life Years) | Global | Both | All ages | Esophageal cancer | Number | 2006 | 11572919 | 12327849 | 10635805 |
| DALYs (Disability-Adjusted Life Years) | China  | Both | All ages | Esophageal cancer | Number | 2018 | 6334216  | 7613820  | 5124183  |
| DALYs (Disability-Adjusted Life Years) | Global | Both | All ages | Esophageal cancer | Number | 2012 | 11454949 | 12409070 | 10648807 |
| DALYs (Disability-Adjusted Life Years) | Global | Both | All ages | Esophageal cancer | Number | 2013 | 11421672 | 12401925 | 10548378 |
| DALYs (Disability-Adjusted Life Years) | Global | Both | All ages | Esophageal cancer | Number | 2011 | 11455478 | 12309224 | 10661743 |
| DALYs (Disability-Adjusted Life Years) | Global | Both | All ages | Esophageal cancer | Number | 2009 | 11428036 | 12164406 | 10553733 |
| DALYs (Disability-Adjusted Life Years) | Global | Both | All ages | Esophageal cancer | Number | 2010 | 11460818 | 12296418 | 10552099 |



|                                        |        |      |          |                   |        |      |          |          |          |
|----------------------------------------|--------|------|----------|-------------------|--------|------|----------|----------|----------|
| DALYs (Disability-Adjusted Life Years) | Global | Both | All ages | Esophageal cancer | Number | 2008 | 11440284 | 12176300 | 10635688 |
| DALYs (Disability-Adjusted Life Years) | Global | Both | All ages | Esophageal cancer | Number | 2014 | 11411292 | 12389263 | 10464314 |
| DALYs (Disability-Adjusted Life Years) | Global | Both | All ages | Esophageal cancer | Number | 2015 | 11553917 | 12536984 | 10567232 |
| DALYs (Disability-Adjusted Life Years) | Global | Both | All ages | Esophageal cancer | Number | 2016 | 11755256 | 12875245 | 10677773 |
| DALYs (Disability-Adjusted Life Years) | Global | Both | All ages | Esophageal cancer | Number | 2019 | 12492269 | 13935620 | 11121474 |
| DALYs (Disability-Adjusted Life Years) | Global | Both | All ages | Esophageal cancer | Number | 2017 | 11900882 | 13292874 | 10789954 |
| DALYs (Disability-Adjusted Life Years) | Global | Both | All ages | Esophageal cancer | Number | 2018 | 12182365 | 13549710 | 10882924 |
| DALYs (Disability-Adjusted Life Years) | Global | Both | All ages | Esophageal cancer | Number | 2021 | 12999265 | 14605268 | 11522861 |
| DALYs (Disability-Adjusted Life Years) | Global | Both | All ages | Esophageal cancer | Number | 2020 | 12740158 | 14334726 | 11297431 |

| <b>measure</b>                         | <b>location</b> | <b>sex</b> | <b>cause</b>      | <b>age</b>       | <b>joinpoint</b> | <b>AAPC.Index</b> | <b>Start.Obs</b> | <b>End.Obs</b> |
|----------------------------------------|-----------------|------------|-------------------|------------------|------------------|-------------------|------------------|----------------|
| Deaths                                 | China           | Both       | Esophageal cancer | Age-standardized | 5                | Full Range        | 1990             | 2021           |
| Deaths                                 | Global          | Both       | Esophageal cancer | Age-standardized | 4                | Full Range        | 1990             | 2021           |
| DALYs (Disability-Adjusted Life Years) | China           | Both       | Esophageal cancer | Age-standardized | 4                | Full Range        | 1990             | 2021           |
| DALYs (Disability-Adjusted Life Years) | Global          | Both       | Esophageal cancer | Age-standardized | 4                | Full Range        | 1990             | 2021           |

| <b>measure</b> | <b>location</b> | <b>sex</b> | <b>cause</b>      | <b>age</b>       | <b>joinpoint</b> | <b>Segment</b> | <b>Segment.Start</b> | <b>Segment.End</b> |
|----------------|-----------------|------------|-------------------|------------------|------------------|----------------|----------------------|--------------------|
| Deaths         | China           | Both       | Esophageal cancer | Age-standardized | 5                | 0              | 1990                 | 1998               |
| Deaths         | China           | Both       | Esophageal cancer | Age-standardized | 5                | 1              | 1998                 | 2004               |
| Deaths         | China           | Both       | Esophageal cancer | Age-standardized | 5                | 2              | 2004                 | 2007               |
| Deaths         | China           | Both       | Esophageal cancer | Age-standardized | 5                | 3              | 2007                 | 2010               |
| Deaths         | China           | Both       | Esophageal cancer | Age-standardized | 5                | 4              | 2010                 | 2015               |
| Deaths         | China           | Both       | Esophageal cancer | Age-standardized | 5                | 5              | 2015                 | 2021               |
| Deaths         | Global          | Both       | Esophageal cancer | Age-standardized | 4                | 0              | 1990                 | 1998               |
| Deaths         | Global          | Both       | Esophageal cancer | Age-standardized | 4                | 1              | 1998                 | 2004               |
| Deaths         | Global          | Both       | Esophageal cancer | Age-standardized | 4                | 2              | 2004                 | 2007               |
| Deaths         | Global          | Both       | Esophageal cancer | Age-standardized | 4                | 3              | 2007                 | 2015               |

|                                        |        |      |                   |                  |   |   |      |      |
|----------------------------------------|--------|------|-------------------|------------------|---|---|------|------|
| Deaths                                 | Global | Both | Esophageal cancer | Age-standardized | 4 | 4 | 2015 | 2021 |
| DALYs (Disability-Adjusted Life Years) | China  | Both | Esophageal cancer | Age-standardized | 4 | 0 | 1990 | 1998 |
| DALYs (Disability-Adjusted Life Years) | China  | Both | Esophageal cancer | Age-standardized | 4 | 1 | 1998 | 2004 |
| DALYs (Disability-Adjusted Life Years) | China  | Both | Esophageal cancer | Age-standardized | 4 | 2 | 2004 | 2007 |
| DALYs (Disability-Adjusted Life Years) | China  | Both | Esophageal cancer | Age-standardized | 4 | 3 | 2007 | 2016 |
| DALYs (Disability-Adjusted Life Years) | China  | Both | Esophageal cancer | Age-standardized | 4 | 4 | 2016 | 2021 |
| DALYs (Disability-Adjusted Life Years) | Global | Both | Esophageal cancer | Age-standardized | 4 | 0 | 1990 | 1998 |
| DALYs (Disability-Adjusted Life Years) | Global | Both | Esophageal cancer | Age-standardized | 4 | 1 | 1998 | 2004 |
| DALYs (Disability-Adjusted Life Years) | Global | Both | Esophageal cancer | Age-standardized | 4 | 2 | 2004 | 2007 |
| DALYs (Disability-Adjusted Life Years) | Global | Both | Esophageal cancer | Age-standardized | 4 | 3 | 2007 | 2015 |
| DALYs (Disability-Adjusted Life Years) | Global | Both | Esophageal cancer | Age-standardized | 4 | 4 | 2015 | 2021 |

| <b>AAPC_95CI</b>          | <b>Significant_indicator</b> | <b>Test.Statistic</b> | <b>P.Value</b> |
|---------------------------|------------------------------|-----------------------|----------------|
| -1.98<br>(-2.19 to -1.77) | Yes                          | -18,6571              | 0              |
| -1.2<br>(-1.33 to -1.07)  | Yes                          | -18,113               | 0              |
| -2.31<br>(-2.46 to -2.16) | Yes                          | -29,3746              | 0              |
| -1.5<br>(-1.61 to -1.39)  | Yes                          | -26,4618              | 0              |

| <b>APC_95CI</b>           | <b>Significant_indicator</b> | <b>Test.Statistic</b> | <b>P.Value</b> |
|---------------------------|------------------------------|-----------------------|----------------|
| -1.42<br>(-1.6 to -1.25)  | Yes                          | -17,4108              | 0              |
| 0.49<br>(0.15 to 0.82)    | Yes                          | 3,0649                | 0,008          |
| -5.87<br>(-7.23 to -4.48) | Yes                          | -8,8177               | 0              |
| -3.06<br>(-4.33 to -1.77) | Yes                          | -5,0199               | 0              |
| -4.21<br>(-4.64 to -3.78) | Yes                          | -20,3779              | 0              |
| -0.74<br>(-1.08 to -0.41) | Yes                          | -4,6754               | 0              |
| -0.76<br>(-0.89 to -0.63) | Yes                          | -11,964               | 0              |
| -0.01<br>(-0.28 to 0.25)  | No                           | -0,0977               | 0,923          |
| -3.53<br>(-4.62 to -2.44) | Yes                          | -6,6859               | 0              |
| -2.26<br>(-2.4 to -2.11)  | Yes                          | -33,1717              | 0              |

|                           |     |          |       |
|---------------------------|-----|----------|-------|
| -0.35<br>(-0.6 to -0.1)   | Yes | -2,9415  | 0,009 |
| -1.75<br>(-1.91 to -1.58) | Yes | -22,2957 | 0     |
| -0.27<br>(-0.57 to 0.04)  | No  | -1,8294  | 0,084 |
| -5.99<br>(-7.17 to -4.79) | Yes | -10,2245 | 0     |
| -4.03<br>(-4.17 to -3.89) | Yes | -58,7824 | 0     |
| -0.24<br>(-0.71 to 0.23)  | No  | -1,0897  | 0,29  |
| -1.02<br>(-1.15 to -0.9)  | Yes | -17,4691 | 0     |
| -0.45<br>(-0.68 to -0.21) | Yes | -4,017   | 0,001 |
| -3.77<br>(-4.67 to -2.86) | Yes | -8,574   | 0     |
| -2.62<br>(-2.74 to -2.5)  | Yes | -43,9329 | 0     |
| -0.52<br>(-0.74 to -0.3)  | Yes | -4,8538  | 0     |

| measure | location | sex  | age         | cause             | metric | year | val    | upper  | lower  |
|---------|----------|------|-------------|-------------------|--------|------|--------|--------|--------|
| Deaths  | Global   | Both | 20-24 years | Esophageal cancer | Rate   | 1990 | 0,12   | 0,13   | 0,10   |
| Deaths  | Global   | Both | 25-29 years | Esophageal cancer | Rate   | 1990 | 0,19   | 0,21   | 0,17   |
| Deaths  | Global   | Both | 30-34 years | Esophageal cancer | Rate   | 1990 | 0,46   | 0,51   | 0,41   |
| Deaths  | Global   | Both | 35-39 years | Esophageal cancer | Rate   | 1990 | 1,38   | 1,57   | 1,21   |
| Deaths  | Global   | Both | 40-44 years | Esophageal cancer | Rate   | 1990 | 3,79   | 4,33   | 3,32   |
| Deaths  | Global   | Both | 45-49 years | Esophageal cancer | Rate   | 1990 | 7,63   | 8,54   | 6,84   |
| Deaths  | Global   | Both | 50-54 years | Esophageal cancer | Rate   | 1990 | 15,55  | 17,34  | 13,81  |
| Deaths  | Global   | Both | 55-59 years | Esophageal cancer | Rate   | 1990 | 25,75  | 28,84  | 22,82  |
| Deaths  | Global   | Both | 60-64 years | Esophageal cancer | Rate   | 1990 | 35,20  | 39,13  | 31,10  |
| Deaths  | Global   | Both | 65-69 years | Esophageal cancer | Rate   | 1990 | 46,20  | 51,17  | 40,01  |
| Deaths  | Global   | Both | 70-74 years | Esophageal cancer | Rate   | 1990 | 60,83  | 67,32  | 52,98  |
| Deaths  | Global   | Both | 75-79 years | Esophageal cancer | Rate   | 1990 | 62,46  | 68,42  | 55,60  |
| Deaths  | Global   | Both | 80-84 years | Esophageal cancer | Rate   | 1990 | 61,67  | 66,63  | 55,06  |
| Deaths  | Global   | Both | 85-89 years | Esophageal cancer | Rate   | 1990 | 67,27  | 72,69  | 58,51  |
| Deaths  | Global   | Both | 90-94 years | Esophageal cancer | Rate   | 1990 | 64,82  | 70,17  | 54,93  |
| Deaths  | Global   | Both | 95+ years   | Esophageal cancer | Rate   | 1990 | 49,07  | 55,09  | 38,63  |
| Deaths  | China    | Both | 20-24 years | Esophageal cancer | Rate   | 1990 | 0,23   | 0,27   | 0,19   |
| Deaths  | China    | Both | 25-29 years | Esophageal cancer | Rate   | 1990 | 0,36   | 0,42   | 0,31   |
| Deaths  | China    | Both | 30-34 years | Esophageal cancer | Rate   | 1990 | 1,13   | 1,33   | 0,97   |
| Deaths  | China    | Both | 35-39 years | Esophageal cancer | Rate   | 1990 | 3,53   | 4,23   | 2,94   |
| Deaths  | China    | Both | 40-44 years | Esophageal cancer | Rate   | 1990 | 10,62  | 12,87  | 8,65   |
| Deaths  | China    | Both | 45-49 years | Esophageal cancer | Rate   | 1990 | 19,95  | 23,99  | 16,39  |
| Deaths  | China    | Both | 50-54 years | Esophageal cancer | Rate   | 1990 | 40,42  | 48,19  | 33,43  |
| Deaths  | China    | Both | 55-59 years | Esophageal cancer | Rate   | 1990 | 66,91  | 80,17  | 55,01  |
| Deaths  | China    | Both | 60-64 years | Esophageal cancer | Rate   | 1990 | 95,57  | 113,72 | 77,39  |
| Deaths  | China    | Both | 65-69 years | Esophageal cancer | Rate   | 1990 | 129,37 | 151,22 | 103,69 |
| Deaths  | China    | Both | 70-74 years | Esophageal cancer | Rate   | 1990 | 176,52 | 204,32 | 143,38 |
| Deaths  | China    | Both | 75-79 years | Esophageal cancer | Rate   | 1990 | 194,78 | 223,31 | 157,63 |
| Deaths  | China    | Both | 80-84 years | Esophageal cancer | Rate   | 1990 | 200,21 | 228,40 | 166,44 |
| Deaths  | China    | Both | 85-89 years | Esophageal cancer | Rate   | 1990 | 245,91 | 276,95 | 197,80 |

|        |        |                  |                   |      |      |        |        |        |
|--------|--------|------------------|-------------------|------|------|--------|--------|--------|
| Deaths | China  | Both 90-94 years | Esophageal cancer | Rate | 1990 | 285,64 | 324,95 | 224,64 |
| Deaths | China  | Both 95+ years   | Esophageal cancer | Rate | 1990 | 211,06 | 258,25 | 134,84 |
| Deaths | China  | Both 20-24 years | Esophageal cancer | Rate | 2021 | 0,12   | 0,16   | 0,10   |
| Deaths | China  | Both 25-29 years | Esophageal cancer | Rate | 2021 | 0,17   | 0,21   | 0,14   |
| Deaths | China  | Both 30-34 years | Esophageal cancer | Rate | 2021 | 0,49   | 0,59   | 0,39   |
| Deaths | China  | Both 35-39 years | Esophageal cancer | Rate | 2021 | 1,21   | 1,53   | 0,95   |
| Deaths | China  | Both 40-44 years | Esophageal cancer | Rate | 2021 | 3,46   | 4,37   | 2,67   |
| Deaths | China  | Both 45-49 years | Esophageal cancer | Rate | 2021 | 7,01   | 9,15   | 5,29   |
| Deaths | China  | Both 50-54 years | Esophageal cancer | Rate | 2021 | 15,62  | 19,92  | 11,90  |
| Deaths | China  | Both 55-59 years | Esophageal cancer | Rate | 2021 | 26,70  | 34,62  | 20,35  |
| Deaths | China  | Both 60-64 years | Esophageal cancer | Rate | 2021 | 43,92  | 56,36  | 34,38  |
| Deaths | China  | Both 65-69 years | Esophageal cancer | Rate | 2021 | 65,08  | 80,40  | 50,60  |
| Deaths | China  | Both 70-74 years | Esophageal cancer | Rate | 2021 | 99,12  | 121,99 | 79,14  |
| Deaths | China  | Both 75-79 years | Esophageal cancer | Rate | 2021 | 129,13 | 156,91 | 102,56 |
| Deaths | China  | Both 80-84 years | Esophageal cancer | Rate | 2021 | 155,48 | 186,54 | 126,54 |
| Deaths | China  | Both 85-89 years | Esophageal cancer | Rate | 2021 | 207,58 | 244,24 | 169,35 |
| Deaths | China  | Both 90-94 years | Esophageal cancer | Rate | 2021 | 207,92 | 246,09 | 160,79 |
| Deaths | China  | Both 95+ years   | Esophageal cancer | Rate | 2021 | 155,42 | 196,35 | 103,89 |
| Deaths | Global | Both 20-24 years | Esophageal cancer | Rate | 2021 | 0,07   | 0,08   | 0,06   |
| Deaths | Global | Both 25-29 years | Esophageal cancer | Rate | 2021 | 0,12   | 0,14   | 0,11   |
| Deaths | Global | Both 30-34 years | Esophageal cancer | Rate | 2021 | 0,27   | 0,30   | 0,24   |
| Deaths | Global | Both 35-39 years | Esophageal cancer | Rate | 2021 | 0,63   | 0,70   | 0,57   |
| Deaths | Global | Both 40-44 years | Esophageal cancer | Rate | 2021 | 1,68   | 1,87   | 1,50   |
| Deaths | Global | Both 45-49 years | Esophageal cancer | Rate | 2021 | 3,86   | 4,41   | 3,40   |
| Deaths | Global | Both 50-54 years | Esophageal cancer | Rate | 2021 | 8,49   | 9,75   | 7,40   |
| Deaths | Global | Both 55-59 years | Esophageal cancer | Rate | 2021 | 14,40  | 16,62  | 12,50  |
| Deaths | Global | Both 60-64 years | Esophageal cancer | Rate | 2021 | 20,37  | 23,21  | 18,06  |
| Deaths | Global | Both 65-69 years | Esophageal cancer | Rate | 2021 | 30,97  | 35,33  | 26,90  |
| Deaths | Global | Both 70-74 years | Esophageal cancer | Rate | 2021 | 42,48  | 48,24  | 37,08  |
| Deaths | Global | Both 75-79 years | Esophageal cancer | Rate | 2021 | 53,20  | 60,47  | 46,28  |
| Deaths | Global | Both 80-84 years | Esophageal cancer | Rate | 2021 | 60,16  | 67,87  | 51,81  |

|                                        |        |                  |                   |      |      |         |         |         |
|----------------------------------------|--------|------------------|-------------------|------|------|---------|---------|---------|
| Deaths                                 | Global | Both 85-89 years | Esophageal cancer | Rate | 2021 | 74,51   | 83,57   | 63,50   |
| Deaths                                 | Global | Both 90-94 years | Esophageal cancer | Rate | 2021 | 71,45   | 80,35   | 58,95   |
| Deaths                                 | Global | Both 95+ years   | Esophageal cancer | Rate | 2021 | 57,70   | 66,19   | 43,00   |
| DALYs (Disability-Adjusted Life Years) | Global | Both 20-24 years | Esophageal cancer | Rate | 1990 | 7,93    | 8,82    | 6,83    |
| DALYs (Disability-Adjusted Life Years) | Global | Both 25-29 years | Esophageal cancer | Rate | 1990 | 12,16   | 13,21   | 10,69   |
| DALYs (Disability-Adjusted Life Years) | Global | Both 30-34 years | Esophageal cancer | Rate | 1990 | 26,82   | 29,64   | 24,06   |
| DALYs (Disability-Adjusted Life Years) | Global | Both 35-39 years | Esophageal cancer | Rate | 1990 | 73,46   | 83,63   | 64,35   |
| DALYs (Disability-Adjusted Life Years) | Global | Both 40-44 years | Esophageal cancer | Rate | 1990 | 183,12  | 208,93  | 160,20  |
| DALYs (Disability-Adjusted Life Years) | Global | Both 45-49 years | Esophageal cancer | Rate | 1990 | 330,08  | 369,05  | 296,04  |
| DALYs (Disability-Adjusted Life Years) | Global | Both 50-54 years | Esophageal cancer | Rate | 1990 | 598,42  | 667,26  | 531,27  |
| DALYs (Disability-Adjusted Life Years) | Global | Both 55-59 years | Esophageal cancer | Rate | 1990 | 870,34  | 974,11  | 771,21  |
| DALYs (Disability-Adjusted Life Years) | Global | Both 60-64 years | Esophageal cancer | Rate | 1990 | 1026,16 | 1140,95 | 906,93  |
| DALYs (Disability-Adjusted Life Years) | Global | Both 65-69 years | Esophageal cancer | Rate | 1990 | 1134,65 | 1257,55 | 984,77  |
| DALYs (Disability-Adjusted Life Years) | Global | Both 70-74 years | Esophageal cancer | Rate | 1990 | 1229,84 | 1363,05 | 1072,34 |
| DALYs (Disability-Adjusted Life Years) | Global | Both 75-79 years | Esophageal cancer | Rate | 1990 | 1012,52 | 1109,06 | 900,44  |
| DALYs (Disability-Adjusted Life Years) | Global | Both 80-84 years | Esophageal cancer | Rate | 1990 | 783,57  | 847,84  | 700,68  |
| DALYs (Disability-Adjusted Life Years) | Global | Both 85-89 years | Esophageal cancer | Rate | 1990 | 680,62  | 735,78  | 592,68  |
| DALYs (Disability-Adjusted Life Years) | Global | Both 90-94 years | Esophageal cancer | Rate | 1990 | 568,59  | 615,89  | 482,92  |
| DALYs (Disability-Adjusted Life Years) | Global | Both 95+ years   | Esophageal cancer | Rate | 1990 | 406,50  | 455,92  | 320,69  |
| DALYs (Disability-Adjusted Life Years) | China  | Both 20-24 years | Esophageal cancer | Rate | 1990 | 15,83   | 18,51   | 13,10   |
| DALYs (Disability-Adjusted Life Years) | China  | Both 25-29 years | Esophageal cancer | Rate | 1990 | 22,80   | 26,36   | 19,29   |
| DALYs (Disability-Adjusted Life Years) | China  | Both 30-34 years | Esophageal cancer | Rate | 1990 | 65,61   | 76,80   | 56,15   |
| DALYs (Disability-Adjusted Life Years) | China  | Both 35-39 years | Esophageal cancer | Rate | 1990 | 187,80  | 225,22  | 156,04  |
| DALYs (Disability-Adjusted Life Years) | China  | Both 40-44 years | Esophageal cancer | Rate | 1990 | 512,55  | 621,61  | 417,38  |
| DALYs (Disability-Adjusted Life Years) | China  | Both 45-49 years | Esophageal cancer | Rate | 1990 | 863,21  | 1038,08 | 709,08  |
| DALYs (Disability-Adjusted Life Years) | China  | Both 50-54 years | Esophageal cancer | Rate | 1990 | 1553,31 | 1853,96 | 1283,32 |
| DALYs (Disability-Adjusted Life Years) | China  | Both 55-59 years | Esophageal cancer | Rate | 1990 | 2261,81 | 2713,09 | 1860,12 |
| DALYs (Disability-Adjusted Life Years) | China  | Both 60-64 years | Esophageal cancer | Rate | 1990 | 2784,86 | 3310,28 | 2255,36 |
| DALYs (Disability-Adjusted Life Years) | China  | Both 65-69 years | Esophageal cancer | Rate | 1990 | 3172,78 | 3711,12 | 2542,15 |
| DALYs (Disability-Adjusted Life Years) | China  | Both 70-74 years | Esophageal cancer | Rate | 1990 | 3564,81 | 4132,25 | 2892,26 |
| DALYs (Disability-Adjusted Life Years) | China  | Both 75-79 years | Esophageal cancer | Rate | 1990 | 3160,24 | 3629,64 | 2559,24 |



|                                        |        |                  |                   |      |      |         |         |         |
|----------------------------------------|--------|------------------|-------------------|------|------|---------|---------|---------|
| DALYs (Disability-Adjusted Life Years) | China  | Both 80-84 years | Esophageal cancer | Rate | 1990 | 2542,31 | 2900,74 | 2117,07 |
| DALYs (Disability-Adjusted Life Years) | China  | Both 85-89 years | Esophageal cancer | Rate | 1990 | 2491,23 | 2810,15 | 2003,84 |
| DALYs (Disability-Adjusted Life Years) | China  | Both 90-94 years | Esophageal cancer | Rate | 1990 | 2507,43 | 2849,70 | 1973,35 |
| DALYs (Disability-Adjusted Life Years) | China  | Both 95+ years   | Esophageal cancer | Rate | 1990 | 1766,51 | 2161,55 | 1127,94 |
| DALYs (Disability-Adjusted Life Years) | China  | Both 20-24 years | Esophageal cancer | Rate | 2021 | 8,28    | 10,62   | 6,51    |
| DALYs (Disability-Adjusted Life Years) | China  | Both 25-29 years | Esophageal cancer | Rate | 2021 | 10,85   | 13,06   | 8,76    |
| DALYs (Disability-Adjusted Life Years) | China  | Both 30-34 years | Esophageal cancer | Rate | 2021 | 28,25   | 34,37   | 22,79   |
| DALYs (Disability-Adjusted Life Years) | China  | Both 35-39 years | Esophageal cancer | Rate | 2021 | 64,62   | 81,61   | 50,88   |
| DALYs (Disability-Adjusted Life Years) | China  | Both 40-44 years | Esophageal cancer | Rate | 2021 | 167,17  | 211,75  | 128,80  |
| DALYs (Disability-Adjusted Life Years) | China  | Both 45-49 years | Esophageal cancer | Rate | 2021 | 303,31  | 396,49  | 229,50  |
| DALYs (Disability-Adjusted Life Years) | China  | Both 50-54 years | Esophageal cancer | Rate | 2021 | 601,60  | 766,41  | 458,38  |
| DALYs (Disability-Adjusted Life Years) | China  | Both 55-59 years | Esophageal cancer | Rate | 2021 | 905,61  | 1173,72 | 690,37  |
| DALYs (Disability-Adjusted Life Years) | China  | Both 60-64 years | Esophageal cancer | Rate | 2021 | 1278,85 | 1641,81 | 1001,59 |
| DALYs (Disability-Adjusted Life Years) | China  | Both 65-69 years | Esophageal cancer | Rate | 2021 | 1597,51 | 1971,30 | 1240,94 |
| DALYs (Disability-Adjusted Life Years) | China  | Both 70-74 years | Esophageal cancer | Rate | 2021 | 2004,99 | 2462,56 | 1601,00 |
| DALYs (Disability-Adjusted Life Years) | China  | Both 75-79 years | Esophageal cancer | Rate | 2021 | 2091,81 | 2545,53 | 1664,98 |
| DALYs (Disability-Adjusted Life Years) | China  | Both 80-84 years | Esophageal cancer | Rate | 2021 | 1966,07 | 2360,14 | 1596,11 |
| DALYs (Disability-Adjusted Life Years) | China  | Both 85-89 years | Esophageal cancer | Rate | 2021 | 2088,89 | 2459,16 | 1706,44 |
| DALYs (Disability-Adjusted Life Years) | China  | Both 90-94 years | Esophageal cancer | Rate | 2021 | 1823,55 | 2157,37 | 1414,86 |
| DALYs (Disability-Adjusted Life Years) | China  | Both 95+ years   | Esophageal cancer | Rate | 2021 | 1288,84 | 1629,15 | 862,86  |
| DALYs (Disability-Adjusted Life Years) | Global | Both 20-24 years | Esophageal cancer | Rate | 2021 | 4,68    | 5,56    | 4,15    |
| DALYs (Disability-Adjusted Life Years) | Global | Both 25-29 years | Esophageal cancer | Rate | 2021 | 7,43    | 8,59    | 6,65    |
| DALYs (Disability-Adjusted Life Years) | Global | Both 30-34 years | Esophageal cancer | Rate | 2021 | 15,76   | 17,50   | 14,25   |
| DALYs (Disability-Adjusted Life Years) | Global | Both 35-39 years | Esophageal cancer | Rate | 2021 | 33,55   | 37,17   | 30,12   |
| DALYs (Disability-Adjusted Life Years) | Global | Both 40-44 years | Esophageal cancer | Rate | 2021 | 81,06   | 90,20   | 72,26   |
| DALYs (Disability-Adjusted Life Years) | Global | Both 45-49 years | Esophageal cancer | Rate | 2021 | 167,12  | 190,88  | 147,41  |
| DALYs (Disability-Adjusted Life Years) | Global | Both 50-54 years | Esophageal cancer | Rate | 2021 | 327,29  | 375,73  | 285,85  |
| DALYs (Disability-Adjusted Life Years) | Global | Both 55-59 years | Esophageal cancer | Rate | 2021 | 488,21  | 564,35  | 423,61  |
| DALYs (Disability-Adjusted Life Years) | Global | Both 60-64 years | Esophageal cancer | Rate | 2021 | 594,12  | 677,76  | 527,23  |
| DALYs (Disability-Adjusted Life Years) | Global | Both 65-69 years | Esophageal cancer | Rate | 2021 | 761,44  | 867,27  | 660,90  |
| DALYs (Disability-Adjusted Life Years) | Global | Both 70-74 years | Esophageal cancer | Rate | 2021 | 860,29  | 979,26  | 752,09  |

|                                        |        |                  |                   |      |      |        |        |        |
|----------------------------------------|--------|------------------|-------------------|------|------|--------|--------|--------|
| DALYs (Disability-Adjusted Life Years) | Global | Both 75-79 years | Esophageal cancer | Rate | 2021 | 862,33 | 979,69 | 751,32 |
| DALYs (Disability-Adjusted Life Years) | Global | Both 80-84 years | Esophageal cancer | Rate | 2021 | 762,55 | 860,31 | 657,14 |
| DALYs (Disability-Adjusted Life Years) | Global | Both 85-89 years | Esophageal cancer | Rate | 2021 | 751,01 | 842,61 | 640,57 |
| DALYs (Disability-Adjusted Life Years) | Global | Both 90-94 years | Esophageal cancer | Rate | 2021 | 626,91 | 705,01 | 516,10 |
| DALYs (Disability-Adjusted Life Years) | Global | Both 95+ years   | Esophageal cancer | Rate | 2021 | 473,96 | 544,82 | 353,48 |

| <b>measure</b>                         | <b>location</b> | <b>sex</b> | <b>age</b> | <b>cause</b>      | <b>metric</b> | <b>year</b> | <b>pred_val</b> | <b>pred_low</b> | <b>pred_up</b> |
|----------------------------------------|-----------------|------------|------------|-------------------|---------------|-------------|-----------------|-----------------|----------------|
| Deaths                                 | China           | Both       | All ages   | Esophageal cancer | Number        | 2022        | 311501          | 273777          | 349225         |
| Deaths                                 | China           | Both       | All ages   | Esophageal cancer | Number        | 2023        | 321523          | 277297          | 365748         |
| Deaths                                 | China           | Both       | All ages   | Esophageal cancer | Number        | 2024        | 332218          | 277838          | 386599         |
| Deaths                                 | China           | Both       | All ages   | Esophageal cancer | Number        | 2025        | 343350          | 275156          | 411544         |
| Deaths                                 | China           | Both       | All ages   | Esophageal cancer | Number        | 2026        | 354628          | 269142          | 440114         |
| Deaths                                 | China           | Both       | All ages   | Esophageal cancer | Number        | 2027        | 365718          | 259667          | 471770         |
| Deaths                                 | China           | Both       | All ages   | Esophageal cancer | Number        | 2028        | 376986          | 247081          | 506892         |
| Deaths                                 | China           | Both       | All ages   | Esophageal cancer | Number        | 2029        | 389014          | 231669          | 546359         |
| Deaths                                 | China           | Both       | All ages   | Esophageal cancer | Number        | 2030        | 401796          | 213154          | 590437         |
| Deaths                                 | China           | Both       | All ages   | Esophageal cancer | Number        | 2031        | 415240          | 191113          | 639367         |
| Deaths                                 | China           | Both       | All ages   | Esophageal cancer | Number        | 2032        | 429147          | 165018          | 693276         |
| Deaths                                 | China           | Both       | All ages   | Esophageal cancer | Number        | 2033        | 444064          | 134574          | 753558         |
| Deaths                                 | China           | Both       | All ages   | Esophageal cancer | Number        | 2034        | 460602          | 99182           | 822031         |
| Deaths                                 | China           | Both       | All ages   | Esophageal cancer | Number        | 2035        | 478673          | 64279           | 899610         |
| Deaths                                 | Global          | Both       | All ages   | Esophageal cancer | Number        | 2022        | 560163          | 522743          | 597582         |
| Deaths                                 | Global          | Both       | All ages   | Esophageal cancer | Number        | 2023        | 574352          | 531035          | 617668         |
| Deaths                                 | Global          | Both       | All ages   | Esophageal cancer | Number        | 2024        | 589343          | 535563          | 643122         |
| Deaths                                 | Global          | Both       | All ages   | Esophageal cancer | Number        | 2025        | 604734          | 537036          | 672432         |
| Deaths                                 | Global          | Both       | All ages   | Esophageal cancer | Number        | 2026        | 620412          | 535279          | 705546         |
| Deaths                                 | Global          | Both       | All ages   | Esophageal cancer | Number        | 2027        | 635913          | 530048          | 741777         |
| Deaths                                 | Global          | Both       | All ages   | Esophageal cancer | Number        | 2028        | 651433          | 521945          | 780920         |
| Deaths                                 | Global          | Both       | All ages   | Esophageal cancer | Number        | 2029        | 667436          | 511425          | 823447         |
| Deaths                                 | Global          | Both       | All ages   | Esophageal cancer | Number        | 2030        | 683976          | 498452          | 869500         |
| Deaths                                 | Global          | Both       | All ages   | Esophageal cancer | Number        | 2031        | 701135          | 482886          | 919384         |
| Deaths                                 | Global          | Both       | All ages   | Esophageal cancer | Number        | 2032        | 718532          | 464209          | 972855         |
| Deaths                                 | Global          | Both       | All ages   | Esophageal cancer | Number        | 2033        | 736408          | 442592          | 1030223        |
| Deaths                                 | Global          | Both       | All ages   | Esophageal cancer | Number        | 2034        | 755138          | 418105          | 1092171        |
| Deaths                                 | Global          | Both       | All ages   | Esophageal cancer | Number        | 2035        | 774676          | 390422          | 1158930        |
| DALYs (Disability-Adjusted Life Years) | China           | Both       | All ages   | Esophageal cancer | Number        | 2022        | 7039697         | 6052321         | 8027073        |
| DALYs (Disability-Adjusted Life Years) | China           | Both       | All ages   | Esophageal cancer | Number        | 2023        | 7197615         | 6084066         | 8311163        |
| DALYs (Disability-Adjusted Life Years) | China           | Both       | All ages   | Esophageal cancer | Number        | 2024        | 7361030         | 6050097         | 8671962        |

|                                        |        |      |                  |                   |        |      |          |          |          |
|----------------------------------------|--------|------|------------------|-------------------|--------|------|----------|----------|----------|
| DALYs (Disability-Adjusted Life Years) | China  | Both | All ages         | Esophageal cancer | Number | 2025 | 7527455  | 5946485  | 9108425  |
| DALYs (Disability-Adjusted Life Years) | China  | Both | All ages         | Esophageal cancer | Number | 2026 | 7693885  | 5773725  | 9614044  |
| DALYs (Disability-Adjusted Life Years) | China  | Both | All ages         | Esophageal cancer | Number | 2027 | 7855265  | 5531996  | 10178534 |
| DALYs (Disability-Adjusted Life Years) | China  | Both | All ages         | Esophageal cancer | Number | 2028 | 8015045  | 5227288  | 10802803 |
| DALYs (Disability-Adjusted Life Years) | China  | Both | All ages         | Esophageal cancer | Number | 2029 | 8181245  | 4865463  | 11497027 |
| DALYs (Disability-Adjusted Life Years) | China  | Both | All ages         | Esophageal cancer | Number | 2030 | 8355386  | 4444959  | 12265814 |
| DALYs (Disability-Adjusted Life Years) | China  | Both | All ages         | Esophageal cancer | Number | 2031 | 8538860  | 3961814  | 13115907 |
| DALYs (Disability-Adjusted Life Years) | China  | Both | All ages         | Esophageal cancer | Number | 2032 | 8730869  | 3409184  | 14052554 |
| DALYs (Disability-Adjusted Life Years) | China  | Both | All ages         | Esophageal cancer | Number | 2033 | 8938327  | 2781597  | 15095058 |
| DALYs (Disability-Adjusted Life Years) | China  | Both | All ages         | Esophageal cancer | Number | 2034 | 9168324  | 2068930  | 16267866 |
| DALYs (Disability-Adjusted Life Years) | China  | Both | All ages         | Esophageal cancer | Number | 2035 | 9420344  | 1440762  | 17586902 |
| DALYs (Disability-Adjusted Life Years) | Global | Both | All ages         | Esophageal cancer | Number | 2022 | 13321007 | 12390692 | 14251322 |
| DALYs (Disability-Adjusted Life Years) | Global | Both | All ages         | Esophageal cancer | Number | 2023 | 13585444 | 12509542 | 14661345 |
| DALYs (Disability-Adjusted Life Years) | Global | Both | All ages         | Esophageal cancer | Number | 2024 | 13849173 | 12545215 | 15153130 |
| DALYs (Disability-Adjusted Life Years) | Global | Both | All ages         | Esophageal cancer | Number | 2025 | 14110611 | 12498954 | 15722268 |
| DALYs (Disability-Adjusted Life Years) | Global | Both | All ages         | Esophageal cancer | Number | 2026 | 14376958 | 12382920 | 16370996 |
| DALYs (Disability-Adjusted Life Years) | Global | Both | All ages         | Esophageal cancer | Number | 2027 | 14644546 | 12198946 | 17090147 |
| DALYs (Disability-Adjusted Life Years) | Global | Both | All ages         | Esophageal cancer | Number | 2028 | 14913105 | 11954437 | 17871773 |
| DALYs (Disability-Adjusted Life Years) | Global | Both | All ages         | Esophageal cancer | Number | 2029 | 15181689 | 11651977 | 18711400 |
| DALYs (Disability-Adjusted Life Years) | Global | Both | All ages         | Esophageal cancer | Number | 2030 | 15448143 | 11290652 | 19605633 |
| DALYs (Disability-Adjusted Life Years) | Global | Both | All ages         | Esophageal cancer | Number | 2031 | 15724986 | 10877736 | 20572235 |
| DALYs (Disability-Adjusted Life Years) | Global | Both | All ages         | Esophageal cancer | Number | 2032 | 16015233 | 10411532 | 21618935 |
| DALYs (Disability-Adjusted Life Years) | Global | Both | All ages         | Esophageal cancer | Number | 2033 | 16321320 | 9892958  | 22749682 |
| DALYs (Disability-Adjusted Life Years) | Global | Both | All ages         | Esophageal cancer | Number | 2034 | 16638141 | 9315703  | 23960580 |
| DALYs (Disability-Adjusted Life Years) | Global | Both | All ages         | Esophageal cancer | Number | 2035 | 16958312 | 8671143  | 25245481 |
| Deaths                                 | China  | Both | Age-standardized | Esophageal cancer | Rate   | 2022 | 14,48    | 12,72    | 16,24    |
| Deaths                                 | China  | Both | Age-standardized | Esophageal cancer | Rate   | 2023 | 14,49    | 12,49    | 16,49    |
| Deaths                                 | China  | Both | Age-standardized | Esophageal cancer | Rate   | 2024 | 14,49    | 12,12    | 16,87    |
| Deaths                                 | China  | Both | Age-standardized | Esophageal cancer | Rate   | 2025 | 14,50    | 11,62    | 17,39    |
| Deaths                                 | China  | Both | Age-standardized | Esophageal cancer | Rate   | 2026 | 14,51    | 11,01    | 18,02    |
| Deaths                                 | China  | Both | Age-standardized | Esophageal cancer | Rate   | 2027 | 14,52    | 10,31    | 18,74    |
| Deaths                                 | China  | Both | Age-standardized | Esophageal cancer | Rate   | 2028 | 14,54    | 9,53     | 19,56    |

|                                        |        |      |                  |                   |      |      |        |        |        |
|----------------------------------------|--------|------|------------------|-------------------|------|------|--------|--------|--------|
| Deaths                                 | China  | Both | Age-standardized | Esophageal cancer | Rate | 2029 | 14,58  | 8,68   | 20,48  |
| Deaths                                 | China  | Both | Age-standardized | Esophageal cancer | Rate | 2030 | 14,63  | 7,75   | 21,50  |
| Deaths                                 | China  | Both | Age-standardized | Esophageal cancer | Rate | 2031 | 14,69  | 6,76   | 22,62  |
| Deaths                                 | China  | Both | Age-standardized | Esophageal cancer | Rate | 2032 | 14,78  | 5,68   | 23,87  |
| Deaths                                 | China  | Both | Age-standardized | Esophageal cancer | Rate | 2033 | 14,89  | 4,51   | 25,26  |
| Deaths                                 | China  | Both | Age-standardized | Esophageal cancer | Rate | 2034 | 15,02  | 3,24   | 26,81  |
| Deaths                                 | China  | Both | Age-standardized | Esophageal cancer | Rate | 2035 | 15,20  | 2,05   | 28,55  |
| Deaths                                 | Global | Both | Age-standardized | Esophageal cancer | Rate | 2022 | 6,27   | 5,85   | 6,69   |
| Deaths                                 | Global | Both | Age-standardized | Esophageal cancer | Rate | 2023 | 6,26   | 5,78   | 6,73   |
| Deaths                                 | Global | Both | Age-standardized | Esophageal cancer | Rate | 2024 | 6,24   | 5,67   | 6,81   |
| Deaths                                 | Global | Both | Age-standardized | Esophageal cancer | Rate | 2025 | 6,23   | 5,53   | 6,93   |
| Deaths                                 | Global | Both | Age-standardized | Esophageal cancer | Rate | 2026 | 6,22   | 5,36   | 7,07   |
| Deaths                                 | Global | Both | Age-standardized | Esophageal cancer | Rate | 2027 | 6,20   | 5,17   | 7,24   |
| Deaths                                 | Global | Both | Age-standardized | Esophageal cancer | Rate | 2028 | 6,19   | 4,96   | 7,42   |
| Deaths                                 | Global | Both | Age-standardized | Esophageal cancer | Rate | 2029 | 6,18   | 4,73   | 7,62   |
| Deaths                                 | Global | Both | Age-standardized | Esophageal cancer | Rate | 2030 | 6,16   | 4,49   | 7,83   |
| Deaths                                 | Global | Both | Age-standardized | Esophageal cancer | Rate | 2031 | 6,15   | 4,24   | 8,07   |
| Deaths                                 | Global | Both | Age-standardized | Esophageal cancer | Rate | 2032 | 6,15   | 3,97   | 8,32   |
| Deaths                                 | Global | Both | Age-standardized | Esophageal cancer | Rate | 2033 | 6,15   | 3,69   | 8,60   |
| Deaths                                 | Global | Both | Age-standardized | Esophageal cancer | Rate | 2034 | 6,15   | 3,40   | 8,89   |
| Deaths                                 | Global | Both | Age-standardized | Esophageal cancer | Rate | 2035 | 6,15   | 3,10   | 9,20   |
| DALYs (Disability-Adjusted Life Years) | China  | Both | Age-standardized | Esophageal cancer | Rate | 2022 | 314,81 | 270,64 | 358,99 |
| DALYs (Disability-Adjusted Life Years) | China  | Both | Age-standardized | Esophageal cancer | Rate | 2023 | 313,47 | 264,94 | 362,00 |
| DALYs (Disability-Adjusted Life Years) | China  | Both | Age-standardized | Esophageal cancer | Rate | 2024 | 312,19 | 256,55 | 367,83 |
| DALYs (Disability-Adjusted Life Years) | China  | Both | Age-standardized | Esophageal cancer | Rate | 2025 | 310,99 | 245,62 | 376,35 |
| DALYs (Disability-Adjusted Life Years) | China  | Both | Age-standardized | Esophageal cancer | Rate | 2026 | 309,95 | 232,54 | 387,35 |
| DALYs (Disability-Adjusted Life Years) | China  | Both | Age-standardized | Esophageal cancer | Rate | 2027 | 309,12 | 217,65 | 400,59 |
| DALYs (Disability-Adjusted Life Years) | China  | Both | Age-standardized | Esophageal cancer | Rate | 2028 | 308,60 | 201,23 | 415,96 |
| DALYs (Disability-Adjusted Life Years) | China  | Both | Age-standardized | Esophageal cancer | Rate | 2029 | 308,43 | 183,43 | 433,43 |
| DALYs (Disability-Adjusted Life Years) | China  | Both | Age-standardized | Esophageal cancer | Rate | 2030 | 308,65 | 164,24 | 453,06 |
| DALYs (Disability-Adjusted Life Years) | China  | Both | Age-standardized | Esophageal cancer | Rate | 2031 | 309,36 | 143,63 | 475,09 |
| DALYs (Disability-Adjusted Life Years) | China  | Both | Age-standardized | Esophageal cancer | Rate | 2032 | 310,66 | 121,47 | 499,86 |

|                                        |        |      |                  |                   |      |      |        |        |        |
|----------------------------------------|--------|------|------------------|-------------------|------|------|--------|--------|--------|
| DALYs (Disability-Adjusted Life Years) | China  | Both | Age-standardized | Esophageal cancer | Rate | 2033 | 312,67 | 97,55  | 527,78 |
| DALYs (Disability-Adjusted Life Years) | China  | Both | Age-standardized | Esophageal cancer | Rate | 2034 | 315,42 | 71,55  | 559,30 |
| DALYs (Disability-Adjusted Life Years) | China  | Both | Age-standardized | Esophageal cancer | Rate | 2035 | 318,95 | 49,03  | 594,94 |
| DALYs (Disability-Adjusted Life Years) | Global | Both | Age-standardized | Esophageal cancer | Rate | 2022 | 147,28 | 137,00 | 157,57 |
| DALYs (Disability-Adjusted Life Years) | Global | Both | Age-standardized | Esophageal cancer | Rate | 2023 | 146,60 | 134,99 | 158,22 |
| DALYs (Disability-Adjusted Life Years) | Global | Both | Age-standardized | Esophageal cancer | Rate | 2024 | 145,88 | 132,14 | 159,61 |
| DALYs (Disability-Adjusted Life Years) | Global | Both | Age-standardized | Esophageal cancer | Rate | 2025 | 145,08 | 128,51 | 161,66 |
| DALYs (Disability-Adjusted Life Years) | Global | Both | Age-standardized | Esophageal cancer | Rate | 2026 | 144,34 | 124,31 | 164,37 |
| DALYs (Disability-Adjusted Life Years) | Global | Both | Age-standardized | Esophageal cancer | Rate | 2027 | 143,68 | 119,68 | 167,68 |
| DALYs (Disability-Adjusted Life Years) | Global | Both | Age-standardized | Esophageal cancer | Rate | 2028 | 143,09 | 114,69 | 171,50 |
| DALYs (Disability-Adjusted Life Years) | Global | Both | Age-standardized | Esophageal cancer | Rate | 2029 | 142,51 | 109,36 | 175,66 |
| DALYs (Disability-Adjusted Life Years) | Global | Both | Age-standardized | Esophageal cancer | Rate | 2030 | 141,90 | 103,69 | 180,11 |
| DALYs (Disability-Adjusted Life Years) | Global | Both | Age-standardized | Esophageal cancer | Rate | 2031 | 141,38 | 97,78  | 184,99 |
| DALYs (Disability-Adjusted Life Years) | Global | Both | Age-standardized | Esophageal cancer | Rate | 2032 | 141,04 | 91,66  | 190,43 |
| DALYs (Disability-Adjusted Life Years) | Global | Both | Age-standardized | Esophageal cancer | Rate | 2033 | 140,90 | 85,36  | 196,43 |
| DALYs (Disability-Adjusted Life Years) | Global | Both | Age-standardized | Esophageal cancer | Rate | 2034 | 140,84 | 78,81  | 202,88 |
| DALYs (Disability-Adjusted Life Years) | Global | Both | Age-standardized | Esophageal cancer | Rate | 2035 | 140,79 | 71,93  | 209,66 |
